# Supplementary material for: Flock Management Risk Factors Associated with Q Fever Infection in Sheep in Saudi Arabia
Source: MDPI journal article supplement (doi:10.3390/ani11071948), 2021-06-30
Supplement: s1 [file s1]

**Table S1.** Total number of tested and proportion of Q fever positive sheep by ELISA and PCR in infected and non-infected control flocks.

| Flock ID                             | Tested flocks     |                   | No. of tested sheep (% of positive) |                         |                     |                  |                  |
|--------------------------------------|-------------------|-------------------|-------------------------------------|-------------------------|---------------------|------------------|------------------|
|                                      | ELISA             | PCR               | ELISA (Serum)                       | PCR (Aborted materials) | PCR (Vaginal swabs) | PCR (Faecal)     | PCR (Milk)       |
| <b>I. Flocks with cases (n = 25)</b> |                   |                   |                                     |                         |                     |                  |                  |
| 2                                    | +                 | +                 | 20 (15.0)                           | 0 (0.0)                 | 2 (100.0)           | 0 (0.0)          | 3 (0.0)          |
| 3                                    | +                 | +                 | 20 (30.0)                           | 1 (100.0)               | 5 (60.0)            | 0 (0.0)          | 2 (0.0)          |
| 6                                    | +                 | +                 | 40 (20.0)                           | 1 (100.0)               | 2 (50.0)            | 3 (66.7)         | 4 (25.0)         |
| 8                                    | +                 | +                 | 35 (28.6)                           | 2 (100.0)               | 5 (60.0)            | 2 (50.0)         | 3 (66.7)         |
| 11                                   | +                 | +                 | 80 (27.5)                           | 3 (100.0)               | 6 (66.7)            | 5 (40.0)         | 4 (25.0)         |
| 13                                   | +                 | +                 | 20 (45.0)                           | 2 (100.0)               | 6 (33.3)            | 2 (0.0)          | 2 (0.0)          |
| 15                                   | +                 | +                 | 60 (23.3)                           | 2 (100.0)               | 5 (60.0)            | 4 (25.0)         | 3 (33.3)         |
| 18                                   | +                 | +                 | 75 (30.7)                           | 1 (100.0)               | 3 (100.0)           | 3 (33.3)         | 3 (33.3)         |
| 19                                   | +                 | +                 | 10 (60.0)                           | 1 (100.0)               | 3 (66.7)            | 1 (100.0)        | 0 (0.0)          |
| 20                                   | +                 | +                 | 100 (20.0)                          | 1 (100.0)               | 4 (50.0)            | 3 (0.0)          | 4 (50.0)         |
| 22                                   | +                 | +                 | 85 (22.4)                           | 2 (100.0)               | 5 (60.0)            | 3 (33.3)         | 3 (33.3)         |
| 27                                   | +                 | +                 | 55 (14.5)                           | 1 (100.0)               | 4 (25.0)            | 2 (0.0)          | 4 (0.0)          |
| 28                                   | +                 | +                 | 130 (23.1)                          | 1 (100.0)               | 4 (25.0)            | 3 (0.0)          | 6 (16.7)         |
| 30                                   | +                 | +                 | 15 (40.0)                           | 1 (100.0)               | 4 (25.0)            | 3 (0.0)          | 3 (0.0)          |
| 36                                   | +                 | +                 | 25 (28.0)                           | 1 (100.0)               | 3 (100.0)           | 3 (0.0)          | 3 (0.0)          |
| 37                                   | +                 | +                 | 110 (23.6)                          | 3 (66.7)                | 5 (40.0)            | 4 (50.0)         | 4 (50.0)         |
| 39                                   | +                 | +                 | 20 (25.0)                           | 1 (100.0)               | 5 (40.0)            | 4 (0.0)          | 5 (0.0)          |
| 41                                   | +                 | +                 | 150 (16.0)                          | 2 (100.0)               | 5 (100.0)           | 5 (40.0)         | 6 (33.3)         |
| 43                                   | +                 | +                 | 40 (20.0)                           | 0 (0.0)                 | 3 (33.3)            | 4 (0.0)          | 4 (25.0)         |
| 44                                   | +                 | +                 | 80 (13.8)                           | 1 (100.0)               | 4 (50.0)            | 5 (40.0)         | 5 (0.0)          |
| 45                                   | +                 | +                 | 140 (19.3)                          | 2 (100.0)               | 4 (50.0)            | 5 (20.0)         | 5 (40.0)         |
| 46                                   | +                 | +                 | 100 (14.0)                          | 1 (100.0)               | 5 (20.0)            | 4 (25.0)         | 5 (0.0)          |
| 48                                   | +                 | +                 | 50 (30.0)                           | 3 (0.0)                 | 7 (57.1)            | 4 (50.0)         | 4 (100.0)        |
| 49                                   | +                 | +                 | 60 (15.0)                           | 1 (100.0)               | 3 (100.0)           | 6 (16.7)         | 6 (16.7)         |
| 50                                   | +                 | +                 | 90 (23.3)                           | 2 (100.0)               | 4 (100.0)           | 4 (25.0)         | 4 (25.0)         |
| <b>Total</b>                         | <b>25 (100.0)</b> | <b>25 (100.0)</b> | <b>1610 (21.8)</b>                  | <b>36 (88.9)</b>        | <b>106 (56.6)</b>   | <b>82 (25.6)</b> | <b>95 (25.3)</b> |
| <b>II. Control flocks (n = 25)</b>   |                   |                   |                                     |                         |                     |                  |                  |
| 1                                    | –                 | –                 | 10 (0.0)                            | 0 (0.0)                 | 1 (0.0)             | 0 (0.0)          | 1 (0.0)          |
| 4                                    | –                 | –                 | 20 (0.0)                            | 0 (0.0)                 | 2 (0.0)             | 0 (0.0)          | 3 (0.0)          |
| 5                                    | +                 | –                 | 25 (6.7)                            | 0 (0.0)                 | 3 (0.0)             | 0 (0.0)          | 3 (0.0)          |
| 7                                    | –                 | –                 | 40 (0.0)                            | 2 (0.0)*                | 3 (0.0)             | 1 (0.0)          | 3 (0.0)          |

|              |                  |                 |                  |                 |                 |                 |                 |
|--------------|------------------|-----------------|------------------|-----------------|-----------------|-----------------|-----------------|
| 9            | —                | —               | 30 (0.0)         | 0 (0.0)         | 3 (0.0)         | 2 (0.0)         | 2 (0.0)         |
| 10           | —                | —               | 40 (0.0)         | 2 (0.0)*        | 5 (0.0)         | 2 (0.0)         | 5 (0.0)         |
| 12           | +                | —               | 24 (16.7)        | 0 (0.0)         | 3 (0.0)         | 2 (0.0)         | 3 (0.0)         |
| 14           | —                | —               | 19 (0.0)         | 2 (0.0)*        | 3 (0.0)         | 2 (0.0)         | 2 (0.0)         |
| 16           | —                | —               | 45 (0.0)         | 0 (0.0)         | 2 (0.0)         | 2 (0.0)         | 2 (0.0)         |
| 17           | —                | —               | 15 (0.0)         | 0 (0.0)         | 3 (0.0)         | 3 (0.0)         | 2 (0.0)         |
| 21           | —                | —               | 50 (0.0)         | 1 (0.0)*        | 3 (0.0)         | 2 (0.0)         | 3 (0.0)         |
| 23           | +                | —               | 30 (20.0)        | 0 (0.0)         | 3 (0.0)         | 3 (0.0)         | 4 (0.0)         |
| 24           | —                | —               | 30 (0.0)         | 0 (0.0)         | 2 (0.0)         | 2 (0.0)         | 2 (0.0)         |
| 25           | —                | —               | 25 (0.0)         | 0 (0.0)         | 3 (0.0)         | 2 (0.0)         | 3 (0.0)         |
| 26           | —                | —               | 45 (0.0)         | 0 (0.0)         | 3 (0.0)         | 2 (0.0)         | 3 (0.0)         |
| 29           | —                | —               | 25 (0.0)         | 0 (0.0)         | 3 (0.0)         | 3 (0.0)         | 3 (0.0)         |
| 31           | —                | —               | 10 (0.0)         | 2 (0.0)*        | 2 (0.0)         | 2 (0.0)         | 3 (0.0)         |
| 32           | —                | —               | 50 (0.0)         | 0 (0.0)         | 3 (0.0)         | 3 (0.0)         | 3 (0.0)         |
| 33           | +                | —               | 60 (6.7)         | 0 (0.0)         | 2 (0.0)         | 2 (0.0)         | 2 (0.0)         |
| 34           | —                | —               | 20 (0.0)         | 0 (0.0)         | 2 (0.0)         | 2 (0.0)         | 2 (0.0)         |
| 35           | +                | —               | 34 (11.8)        | 0 (0.0)         | 3 (0.0)         | 3 (0.0)         | 3 (0.0)         |
| 38           | —                | —               | 50 (0.0)         | 2 (0.0)*        | 3 (0.0)         | 3 (0.0)         | 3 (0.0)         |
| 40           | —                | —               | 35 (0.0)         | 1 (0.0)*        | 2 (0.0)         | 3 (0.0)         | 3 (0.0)         |
| 42           | +                | —               | 30 (10.0)        | 1 (0.0)*        | 3 (0.0)         | 3 (0.0)         | 3 (0.0)         |
| 47           | +                | —               | 65 (7.7)         | 1 (0.0)*        | 2 (0.0)         | 3 (0.0)         | 3 (0.0)         |
| <b>Total</b> | <b>25 (28.0)</b> | <b>25 (0.0)</b> | <b>827 (3.3)</b> | <b>14 (0.0)</b> | <b>67 (0.0)</b> | <b>52 (0.0)</b> | <b>69 (0.0)</b> |

\* Vaginal secretion samples from sheep with no history of recent abortion.

**Table S2.** Management practices of Q fever infected and non-infected control flocks in Eastern Province, Saudi Arabia.

| <b>Factors</b>                                         | <b>No. of infected<br/>(cases = 25) flocks</b> | <b>No. of non-infected<br/>(control = 25) flocks</b> |
|--------------------------------------------------------|------------------------------------------------|------------------------------------------------------|
| <b>Flock size</b>                                      |                                                |                                                      |
| Small <290                                             | 9                                              | 16                                                   |
| Medium (290-500)                                       | 10                                             | 9                                                    |
| Large >500                                             | 6                                              | 0                                                    |
| <b>Purchase of breeding replacement</b>                |                                                |                                                      |
| No                                                     | 5                                              | 12                                                   |
| Yes                                                    | 20                                             | 13                                                   |
| <b>Quarantine of purchased animals</b>                 |                                                |                                                      |
| No                                                     | 20                                             | 17                                                   |
| Yes                                                    | 5                                              | 8                                                    |
| <b>Animal exchange during breeding</b>                 |                                                |                                                      |
| No                                                     | 4                                              | 18                                                   |
| Yes                                                    | 21                                             | 7                                                    |
| <b>Contact with other sheep flocks</b>                 |                                                |                                                      |
| No                                                     | 6                                              | 14                                                   |
| Yes                                                    | 19                                             | 11                                                   |
| <b>Contact with other animals</b>                      |                                                |                                                      |
| No                                                     | 2                                              | 7                                                    |
| Yes                                                    | 23                                             | 18                                                   |
| <b>Lambing pen</b>                                     |                                                |                                                      |
| No                                                     | 16                                             | 9                                                    |
| Yes                                                    | 9                                              | 16                                                   |
| <b>Recent history of abortion</b>                      |                                                |                                                      |
| No                                                     | 0                                              | 25                                                   |
| Yes                                                    | 25                                             | 0                                                    |
| <b>Change bedding after removing aborted materials</b> |                                                |                                                      |
| No                                                     | 17                                             | 8                                                    |
| Yes                                                    | 8                                              | 17                                                   |
| <b>Disinfect bedding after abortion</b>                |                                                |                                                      |
| No                                                     | 22                                             | 11                                                   |
| Yes                                                    | 3                                              | 14                                                   |

|                             |    |    |
|-----------------------------|----|----|
| <b>Isolate aborted ewes</b> |    |    |
| No                          | 17 | 15 |
| Yes                         | 8  | 10 |
| <b>Ticks on animals</b>     |    |    |
| No                          | 11 | 19 |
| Yes                         | 14 | 6  |
| <b>Ticks in environment</b> |    |    |
| No                          | 14 | 23 |
| Yes                         | 11 | 2  |
| <b>Manure spreading</b>     |    |    |
| No                          | 6  | 14 |
| Yes                         | 19 | 11 |
| <b>History of Q fever</b>   |    |    |
| No                          | 21 | 25 |
| Yes                         | 4  | 0  |

---
